# Supplementary figures and images for: Transcriptomic Analysis Provides Novel Insights into Heat Stress Responses in Sheep
Source: MDPI journal article supplement (doi:10.3390/ani9060387), 2019-06-24

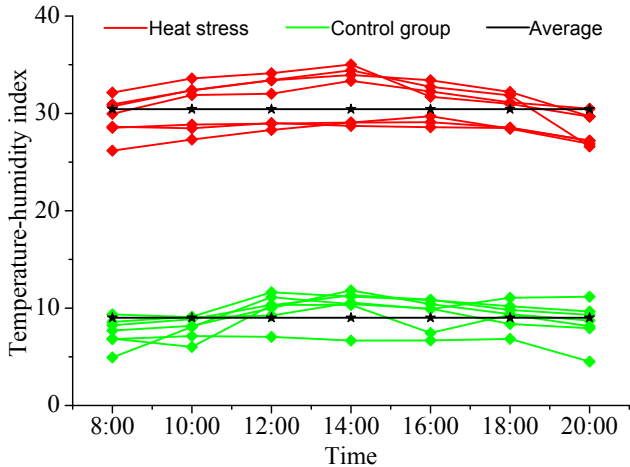

Supplement: s1 [file s1]
